# Supplementary material for: Synthesis of butterfly-like ZnO nanostructures and study of their self-reducing ability toward Au3+ ions for enhanced photocatalytic efficiency
Source: Royal Society of Chemistry journal article supplement (doi:10.1039/c5cp07187a), 2016-01-01
Supplement: c5cp07187a1.pdf [file c5cp07187a1.pdf]

## Supporting Information

### Synthesis of butterfly-like ZnO and their reducing ability for $\text{Au}^{3+}$ ions towards enhanced photocatalysis

Xueling Song, Yumeng Liu, Yan Zheng, Kun Ding, Shijie Nie, and Ping Yang\*

<sup>a</sup>School of Material Science and Engineering, University of Jinan, Jinan, 250022, P.R. China.

Fax: +86 531 87974453; Tel: +86 531 89736225

E-mail: mse\_yangp@ujn.edu.cn

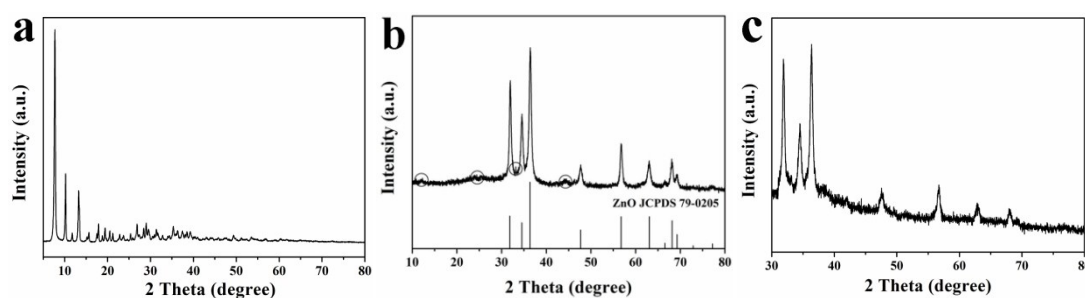

Figure S1 XRD patterns of (a) precursor of sample 1, (b) sample 2 synthesized at 150 °C, and (c) sample 1-Au.

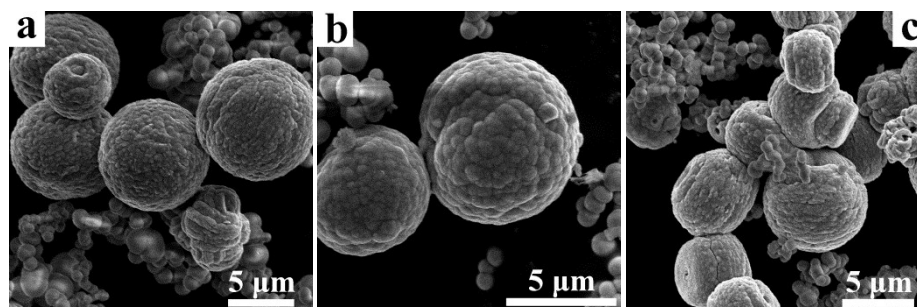

Figure S2 SEM images of ZnO products synthesized at 100 °C with different concentrations of HMT: (a) sample 6, 0.05 M; (b) sample 7, 0.10 M; and (c) sample 8, 0.15 M.

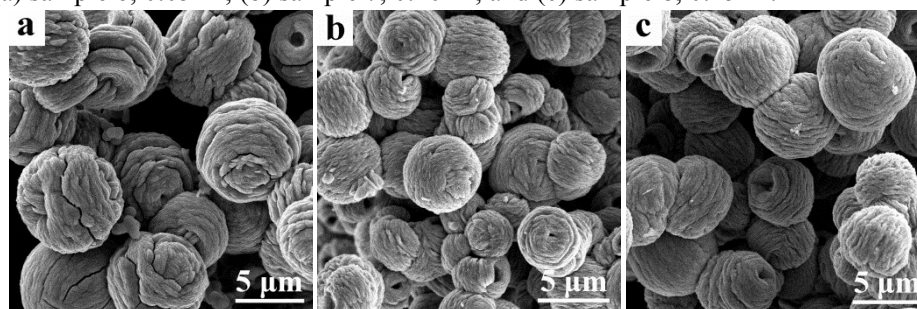

Figure S3 SEM images of ZnO products synthesized at 150 °C with different concentrations of HMT: (a) sample 9, 0.05 M; (b) sample 10, 0.10 M; and (c) sample 11, 0.15 M.
